# Supplementary material for: Structure and mechanical properties of transparent layered nanocomposites from LAPONITE®-hydroxyethyl cellulose vacuum-assisted self-assembly
Source: Royal Society of Chemistry journal article supplement (doi:10.1039/c5ra00475f), 2015-01-01
Supplement: c5ra00475f1.pdf [file c5ra00475f1.pdf]

## Structure and Mechanical Properties of Bioinspired Layered Nanocomposites from Laponite-Hydroxyethyl Cellulose Vacuum-Assisted Self-Assembly

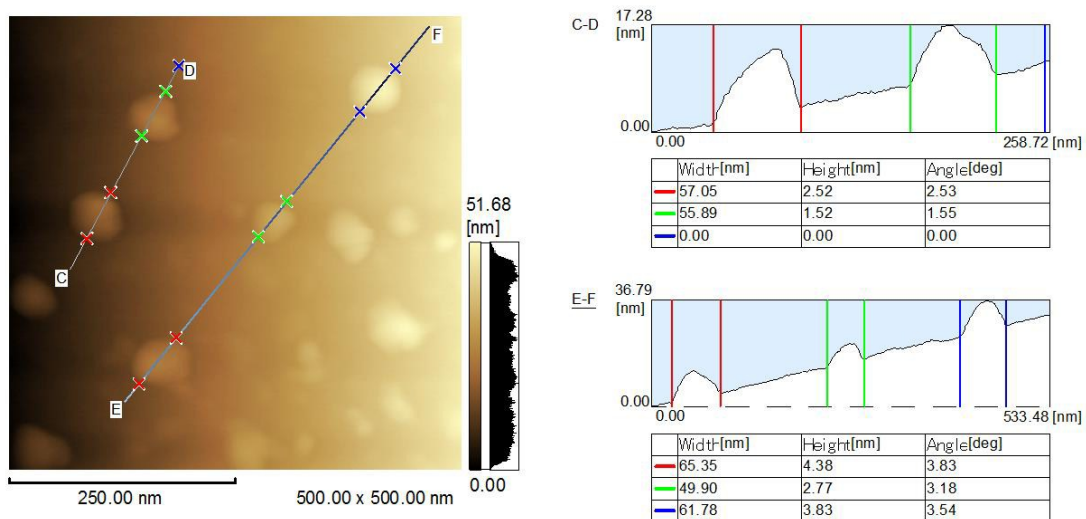

Figure S1 Atomic force microscopy image of LRD nanoplatelets deposited on mica.

Table S1 Density and porosity of LRD/HEC nanocomposites.

| Sample  | Density (Kg m <sup>-3</sup> ) | Porosity (%) |
|---------|-------------------------------|--------------|
| L10/H90 | 637                           | 10           |
| L20/H80 | 643                           | 11           |
| L30/H70 | 647                           | 12           |
| L40/H60 | 650                           | 14           |
| L50/H50 | 655                           | 15           |
| L60/H40 | 659                           | 17           |
| L70/H30 | 664                           | 18           |
| L80/H20 | 689                           | 20           |
| L90/H10 | 696                           | 23           |
